# Supplementary material
Source: PubMed Central journal article supplement (PMC10777159)
Supplement: NIHMS1950926-supplement-Supplementary_Figures.pdf [file NIHMS1950926-supplement-Supplementary_Figures.pdf]

**Supplemental Table 1: Demographic characteristics of participants**

|                                                            | All Participants<br>n=110 | COVID-19 +<br>n=24 | COVID-19 -<br>n=86 |
|------------------------------------------------------------|---------------------------|--------------------|--------------------|
| <b>Demographics</b>                                        |                           |                    |                    |
| <b>Mean Age (years) (±SD)</b>                              | 6.84 (±4.4)               | 6.22 (±3.2)        | 7.01 (±4.7)        |
| <b>Sex</b>                                                 |                           |                    |                    |
| Male                                                       | 61 (55.5%)                | 13 (54.2%)         | 48 (55.8%)         |
| Female                                                     | 49 (44.5%)                | 11 (45.8%)         | 38 (44.2%)         |
| <b>Race/Ethnicity</b>                                      |                           |                    |                    |
| Black                                                      | 27 (24.5%)                | 3 (12.5%)          | 24 (27.9%)         |
| Hispanic                                                   | 42 (38.2%)                | 18 (75.0%)         | 24 (27.9%)         |
| White                                                      | 26 (23.6%)                | 0 (0.0%)           | 26 (30.2%)         |
| Other/Mixed                                                | 15 (13.6%)                | 3 (12.5%)          | 12 (14.0%)         |
| <b>Clinical Characteristics</b>                            |                           |                    |                    |
| <b>Primary Diagnosis</b>                                   |                           |                    |                    |
| Sleep disordered breathing                                 | 60 (54.5%)                | 14 (58.3%)         | 46 (53.5%)         |
| Mild OSA, AHI >1 and < 5                                   | 14 (12.7%)                | 6 (25.0%)          | 8 (9.3%)           |
| Moderate OSA, AHI 5 to 10                                  | 6 (5.5%)                  | 1 (4.2%)           | 5 (5.8%)           |
| Severe OSA, AHI >10                                        | 14 (12.7%)                | 2 (8.3%)           | 12 (14.0%)         |
| Eustachian tube dysfunction                                | 1 (0.9%)                  | 1 (4.2%)           | 0 (0.0%)           |
| PFAPA                                                      | 7 (6.4%)                  | 0 (0.0%)           | 7 (8.1%)           |
| Recurrent tonsillitis                                      | 3 (2.7%)                  | 0 (0.0%)           | 3 (3.5%)           |
| Chronic tonsillitis/tonsil stones                          | 5 (4.5%)                  | 0 (0.0%)           | 5 (5.8%)           |
| <b>Medications (within 2 weeks prior to surgery)</b>       |                           |                    |                    |
| Inhaled or nasal corticosteroid                            | 14 (12.7%)                | 4 (16.7%)          | 10 (11.6%)         |
| Oral corticosteroid                                        | 7 (6.4%)                  | 0 (0.0%)           | 7 (8.1%)           |
| Loratadine (Claritin)                                      | 10 (9.1%)                 | 1 (4.2%)           | 9 (10.5%)          |
| Montelukast (Singulair)                                    | 6 (5.5%)                  | 0 (0.0%)           | 6 (7.0%)           |
| Cetirizine (Zyrtec)                                        | 5 (4.5%)                  | 0 (0.0%)           | 5 (5.8%)           |
| <b>Prior COVID-19 infection by serology/flow cytometry</b> |                           |                    |                    |
| Negative                                                   | 86 (78.2%)                | 0 (0.0%)           | 86 (100%)          |
| Positive                                                   | 24 (21.8%)                | 24 (100%)          | 0 (0.0%)           |

OSA = Obstructive sleep apnea

AHI = Apnea hypopnea index obtained by polysomnography

PFAPA = periodic fever, aphthous stomatitis, pharyngitis, adenitis syndrome

**Supplementary Table 3: Characteristics of Participants with Prior COVID-19**

| Patient ID | Age (years) | Sex | Reason for tonsillectomy/ adenoidectomy | Medication  | Co-morbid conditions | Prior positive SARS-CoV-2 PCR/Ag test | Days from positive PCR/Ag to surgery | Symptomatic at time of positive PCR/Ag test? | Symptoms at time of positive PCR/Ag test                         |
|------------|-------------|-----|-----------------------------------------|-------------|----------------------|---------------------------------------|--------------------------------------|----------------------------------------------|------------------------------------------------------------------|
| CNMC 001   | 2.6         | F   | SDB                                     |             |                      | No                                    |                                      |                                              |                                                                  |
| CNMC 005   | 7.5         | F   | SDB                                     |             | Asthma               | No                                    |                                      |                                              |                                                                  |
| CNMC 008   | 3.4         | M   | Mild OSA                                |             |                      | No                                    |                                      |                                              |                                                                  |
| CNMC 011   | 8           | M   | Mild OSA                                |             | Asthma               | Yes                                   | 142                                  | Symptomatic                                  | Headache, sore throat, diarrhea, myalgia                         |
| CNMC 016   | 8.9         | F   | SDB                                     |             |                      | No                                    |                                      |                                              |                                                                  |
| CNMC 022   | 4.1         | M   | Mild OSA                                |             |                      | Yes                                   | 108                                  | Symptomatic                                  | Cough, myalgia                                                   |
| CNMC 029   | 3.1         | M   | SDB                                     |             |                      | No                                    |                                      |                                              |                                                                  |
| CNMC 032   | 3.6         | F   | Severe OSA                              |             |                      | Yes                                   | 26                                   | Asymptomatic                                 |                                                                  |
| CNMC 041   | 6           | F   | Severe OSA                              |             |                      | No                                    |                                      |                                              |                                                                  |
| CNMC 046   | 7.2         | M   | SDB                                     |             |                      | No                                    |                                      |                                              |                                                                  |
| CNMC 050   | 2.9         | F   | SDB                                     | Inh Steroid |                      | Yes                                   | 31                                   | Asymptomatic                                 |                                                                  |
| CNMC 069   | 3.4         | F   | SDB                                     | Inh Steroid |                      | Yes                                   | 201                                  | Symptomatic                                  | Shortness of breath, myalgia, dizziness, GI symptoms             |
| CNMC 070   | 16.4        | M   | Mild OSA                                |             |                      | Yes                                   | 98                                   | Symptomatic                                  | Fever, cough, anosmia, myalgia, GI symptoms, chest pain          |
| CNMC 071   | 6.2         | F   | SDB                                     |             |                      | Yes                                   | 71                                   | Symptomatic                                  | Fever, cough, shortness of breath, anosmia, myalgia, GI symptoms |
| CNMC 087   | 6           | M   | SDB                                     | Loratadine  |                      | No                                    |                                      |                                              |                                                                  |
| CNMC 089   | 12.1        | F   | SDB                                     |             |                      | No                                    |                                      |                                              |                                                                  |
| CNMC 091   | 9.2         | M   | Moderate OSA                            |             |                      | No                                    |                                      |                                              |                                                                  |
| CNMC 100   | 4.7         | F   | Mild OSA                                | Inh Steroid |                      | Yes                                   | 25                                   | Asymptomatic                                 |                                                                  |
| CNMC 101   | 4.6         | M   | SDB                                     |             |                      | No                                    |                                      |                                              |                                                                  |
| CNMC 102   | 5.1         | M   | SDB                                     |             |                      | Yes                                   | 35                                   | Symptomatic                                  | Fever, myalgia                                                   |
| CNMC 103   | 8.1         | M   | Mild OSA                                |             |                      | Yes                                   | 303                                  | Asymptomatic                                 |                                                                  |
| CNMC 104   | 6.8         | M   | SDB                                     | Inh Steroid |                      | No                                    |                                      |                                              |                                                                  |
| CNMC 108   | 4.2         | F   | ETD                                     |             |                      | Yes                                   | 84                                   | Symptomatic                                  | Cough, diarrhea, nasal congestion                                |
| CNMC 109   | 5.1         | M   | SDB                                     |             |                      | No                                    |                                      |                                              |                                                                  |

SDB: sleep disordered breathing

OSA: obstructive sleep apnea

ETD: eustachian tube dysfunction

Ag: antigen Inh Steroid: inhaled steroid GI: gastrointestinal

F: female M: male

### Supplementary Figure 1

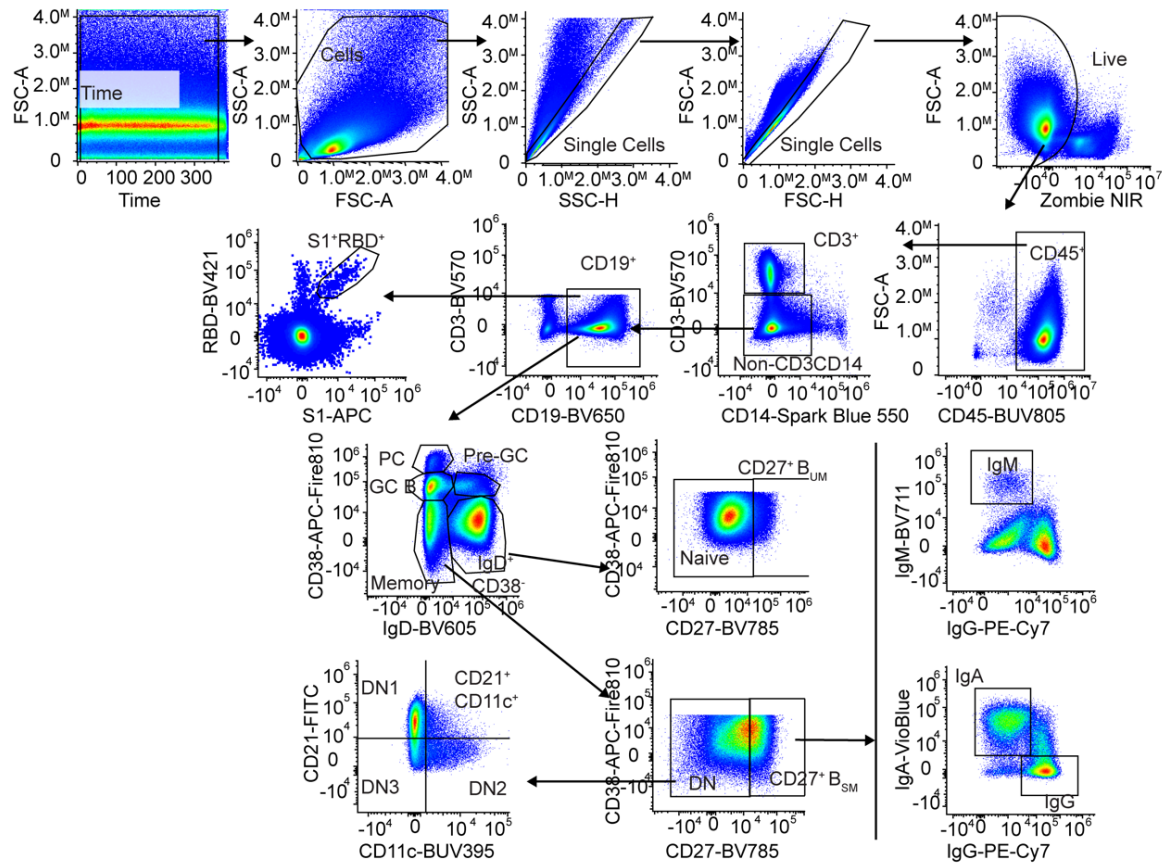

**Supplementary Figure 1. Gating strategy of major CD19<sup>+</sup> B cell populations and S1<sup>+</sup>RBD<sup>+</sup> B cells in pharyngeal tissues**

Representative flow cytometry plots of major B cell populations and S1<sup>+</sup>RBD<sup>+</sup> B cell gating strategy in tonsils and adenoids, including PC (plasma cells), GC (germinal center) B cells, pre-GC (pre-germinal center B cells), naïve (naïve B cells), DN (double negative B cells), CD27<sup>+</sup> B<sub>SM</sub> (CD27<sup>+</sup> switched memory B cells), CD27<sup>+</sup> B<sub>UM</sub> (CD27<sup>+</sup> unswitched memory cells). Gating for DN subsets is also shown.

## Supplementary Figure 2

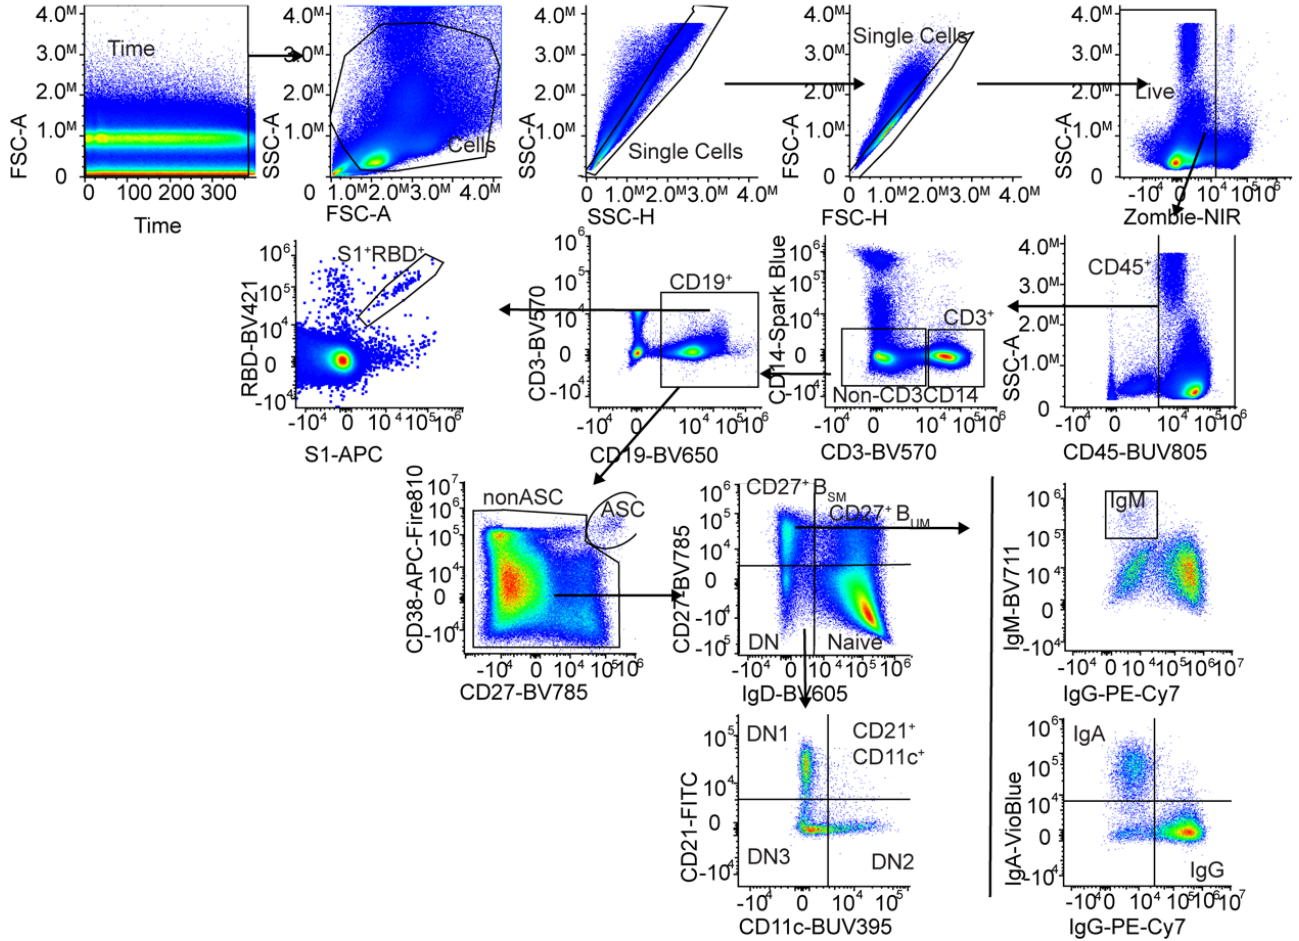

### Supplementary Figure 2. Gating strategy of major CD19<sup>+</sup> B cell populations and S1<sup>+</sup>RBD<sup>+</sup> B cells in peripheral blood

Representative flow cytometry plots of major B cell populations and S1<sup>+</sup>RBD<sup>+</sup> B cell gating strategy in PBMCs, including ASC (antibody secreting cells, equivalent to plasma cells and plasmablasts), naïve (naïve B cells), DN (double negative B cells), CD27<sup>+</sup> B<sub>SM</sub> (CD27<sup>+</sup> switched memory B cells), CD27<sup>+</sup> B<sub>UM</sub> (CD27<sup>+</sup> unswitched memory B cells). Gating for DN subsets is also shown.

### Supplementary Figure 3

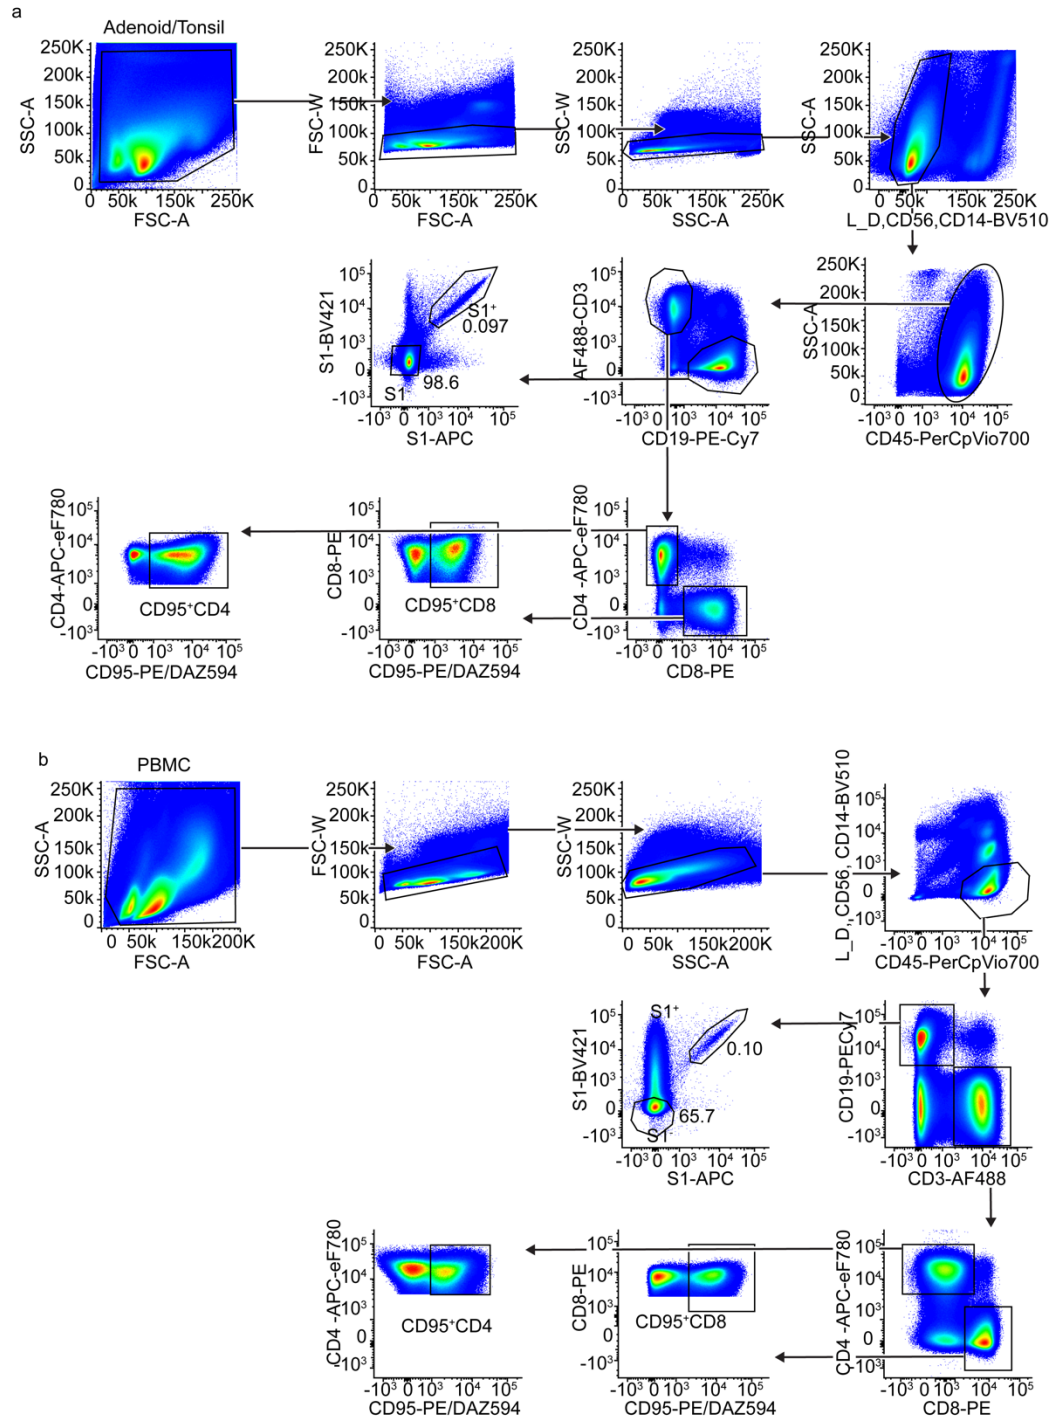

### Supplementary Figure 3. Gating strategy for sorting B and T cells used in CITE-seq

Flow cytometry plots showing sorting strategy for S1 binding (S1<sup>+</sup>) B cells (S1-BV421 and S1-APC double positive), S1<sup>-</sup> B cells, CD95<sup>+</sup> CD4<sup>+</sup> T cells, and CD95<sup>+</sup> CD8<sup>+</sup> T cells in (a) tonsils and adenoids cells and (b) PBMCs. Sorted cells were analyzed with CITE-seq.



## Supplementary Figure 4

a

CNMC71-2781  
Matches:37  
Epitopes:S; RBD,S; Unk,S; probably RBD (implied by clustering)

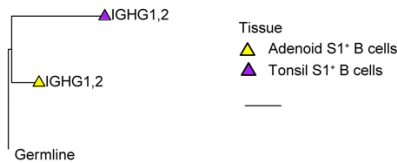

b

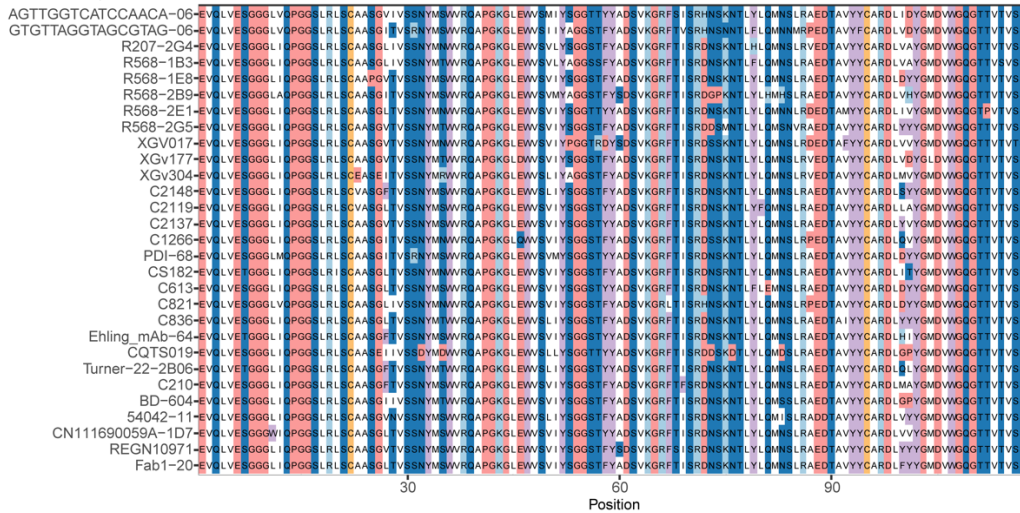

c

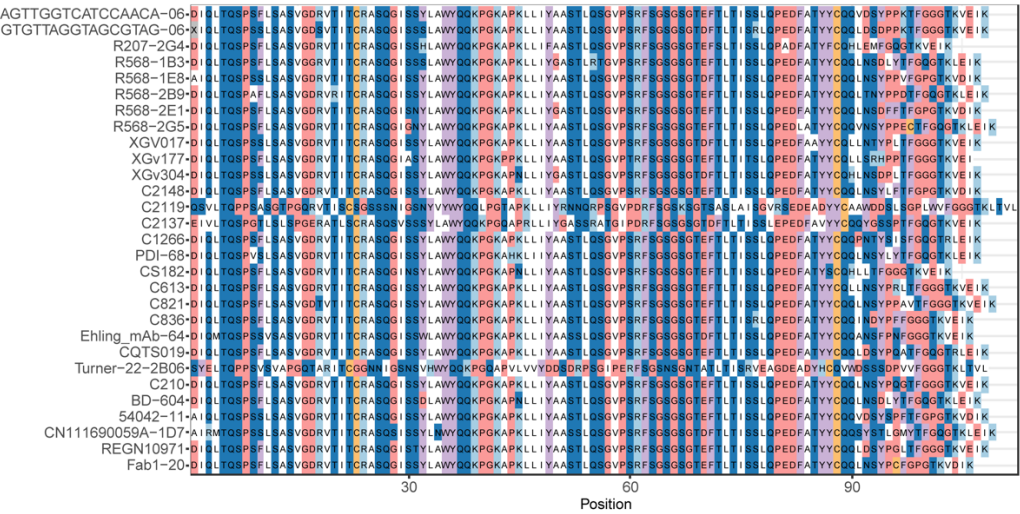

## Supplementary Figure 4. S1<sup>+</sup> B cell clone closely matching publicly reported SARS-CoV-2-specific BCR

One S1<sup>+</sup> B cell clone (a) found in both the tonsil and adenoid of CNMC 71 (post-COV participant) was highly similar to 37 BCR heavy chain sequences in the CoV-AbDab database of SARS-CoV-2 specific antibody sequences. Similarity of both the heavy chain (b) and light chain (c) sequences of this clone (noted in first two lines of each panel) to convergent sequences in CoV-AbDab are shown. Only sequence matches from CoV-AbDab with full length sequences available are shown.

## Supplementary Figure 5

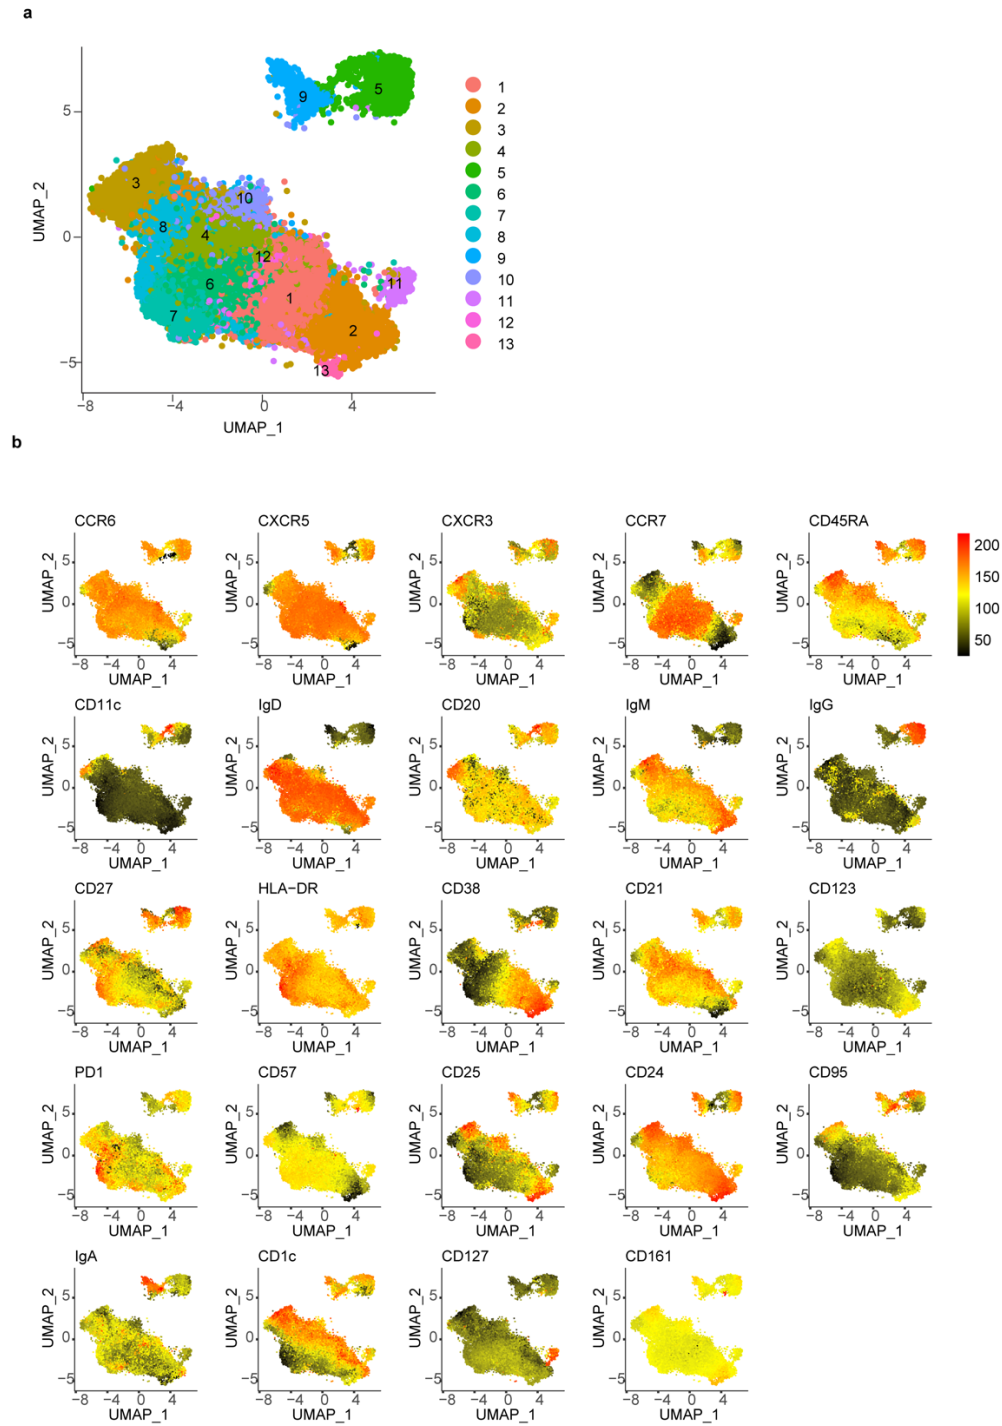

### Supplementary Figure 5. UMAP of unsupervised clustering of B cells from PBMC

- UMAP of unsupervised clustering of surface markers from flow cytometric analysis of CD19<sup>+</sup> B cells from PBMC.
- Heatmaps of marker/antibody expression overlaid on UMAP.

## Supplementary Figure 6

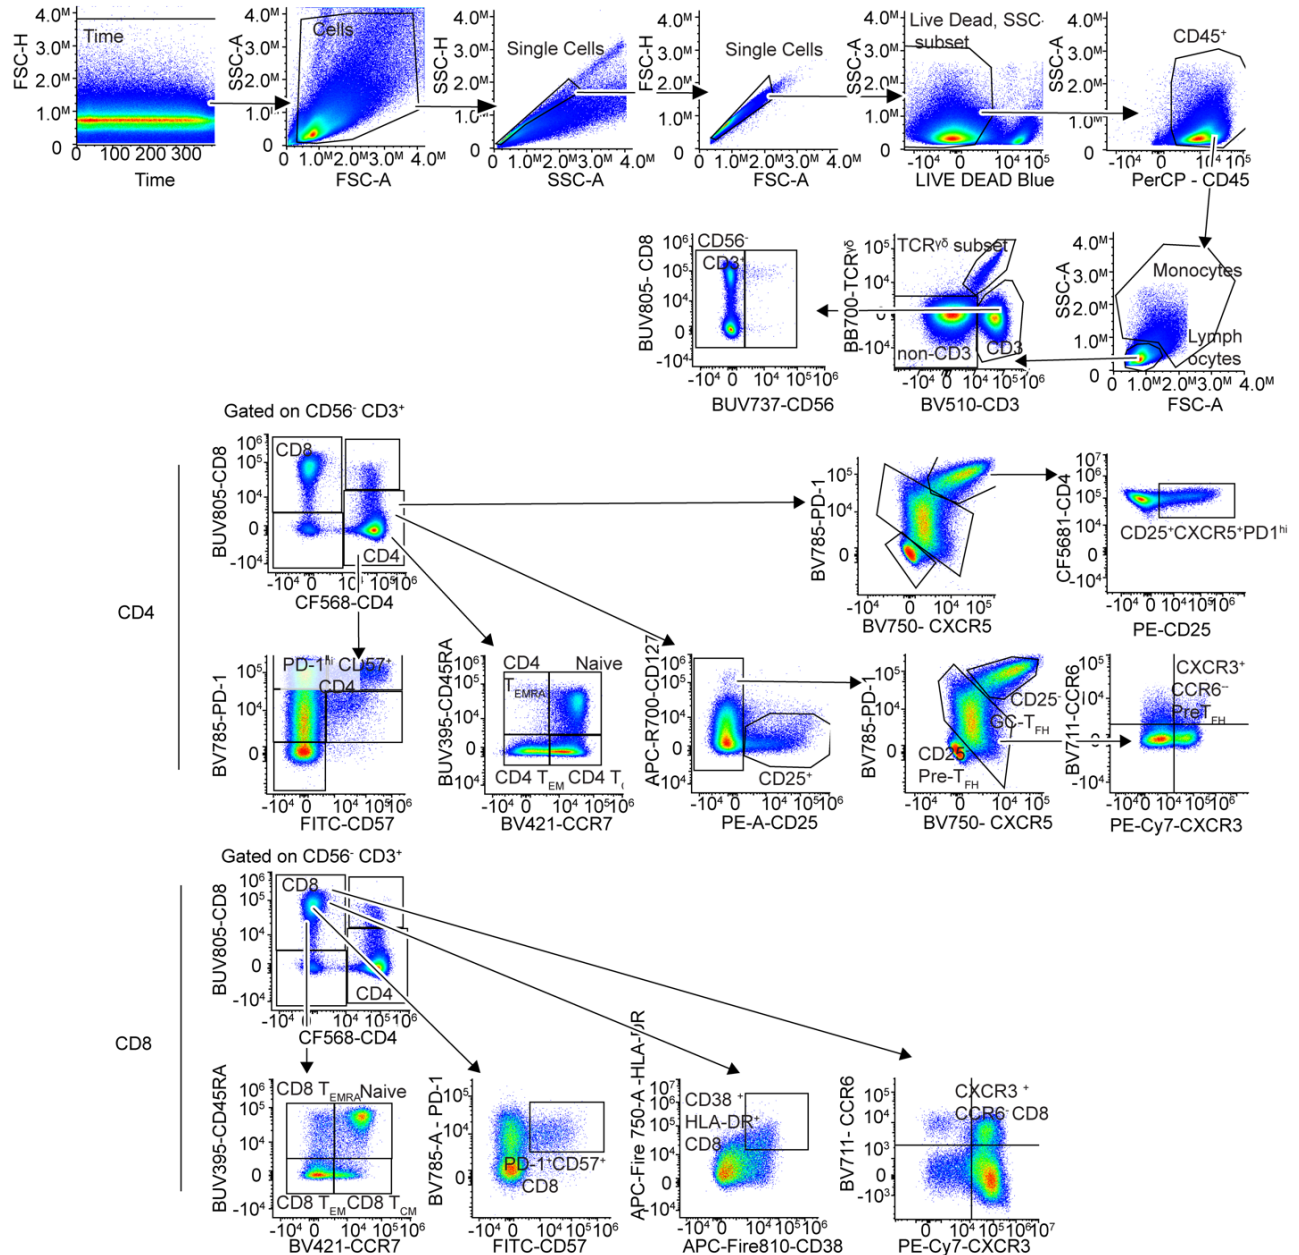

### Supplementary Figure 6. Gating strategy of major CD4<sup>+</sup> and CD8<sup>+</sup> T cell populations in tonsils and adenoids

Representative flow cytometry plots are shown. T<sub>EM</sub> are effector memory T cells, T<sub>CM</sub> are central memory T cells, T<sub>EMRA</sub> are terminally differentiated effector memory T cells, and T<sub>FH</sub> are T follicular helper cells.



### Supplementary Figure 7

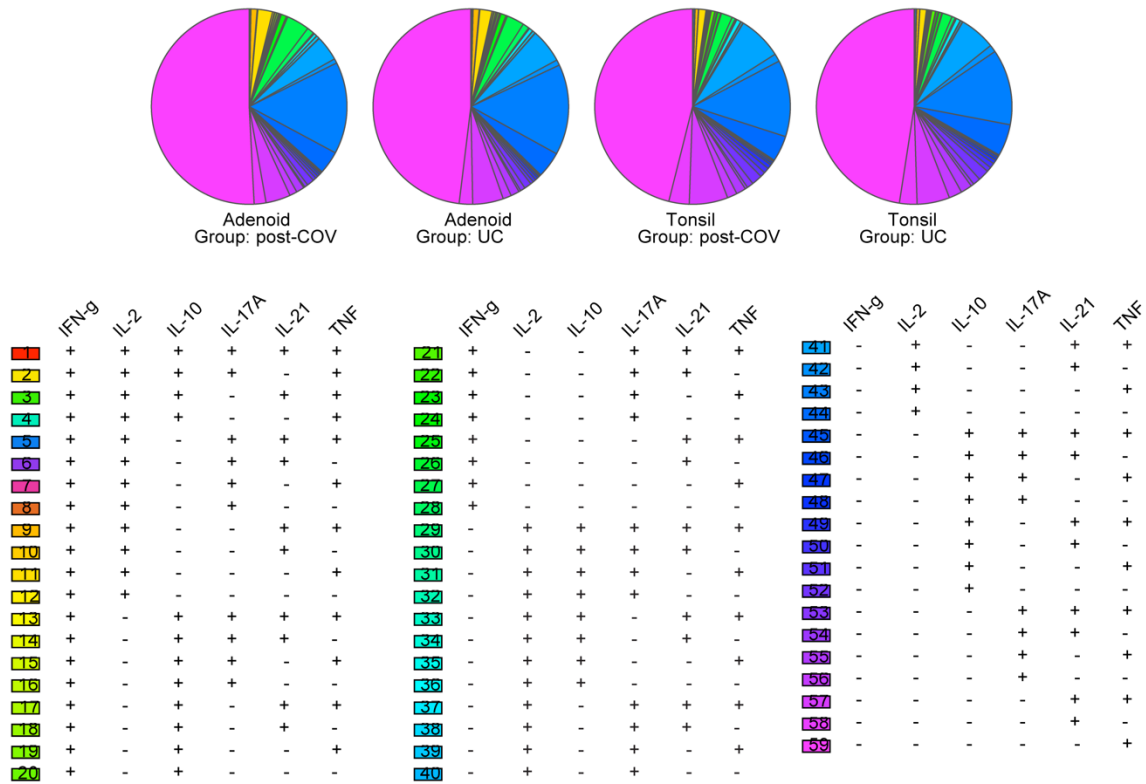

### Supplementary Figure 7. SPICE analysis of CD4<sup>+</sup> T cells from tonsils and adenoids

Pie charts show the proportion of responding CD4<sup>+</sup> T cells from adenoids and tonsils producing 59 different combinations of 6 cytokines (IFN- $\gamma$ , IL-2, IL-10, IL-17A, IL-21 and TNF) after PMA and ionomycin stimulation from post-COV and UC donors (adenoid post-COV n=13, UC n=13; tonsil post-COV n=13, UC n=13). Frequencies were determined by Boolean combination gates in FlowJo and analyzed with SPICE. Combinations with frequencies below 0.01 from each donor were excluded from the analysis (categories IFN $\gamma$ +IL2+IL10+IL17A+IL21+TNF-, IFN $\gamma$ +IL2+IL10+IL17A+IL21-TNF-, IFN $\gamma$ +IL2+IL10+IL17A-IL21+TNF- and IFN $\gamma$ +IL2+IL10+IL17A-IL21-TNF- were excluded). Significance calculated using two-sided Mann-Whitney U test. Combinations with significant differences ( $p < 0.05$ ) in post-COV and UC are highlighted in red.

### Supplementary Figure 8

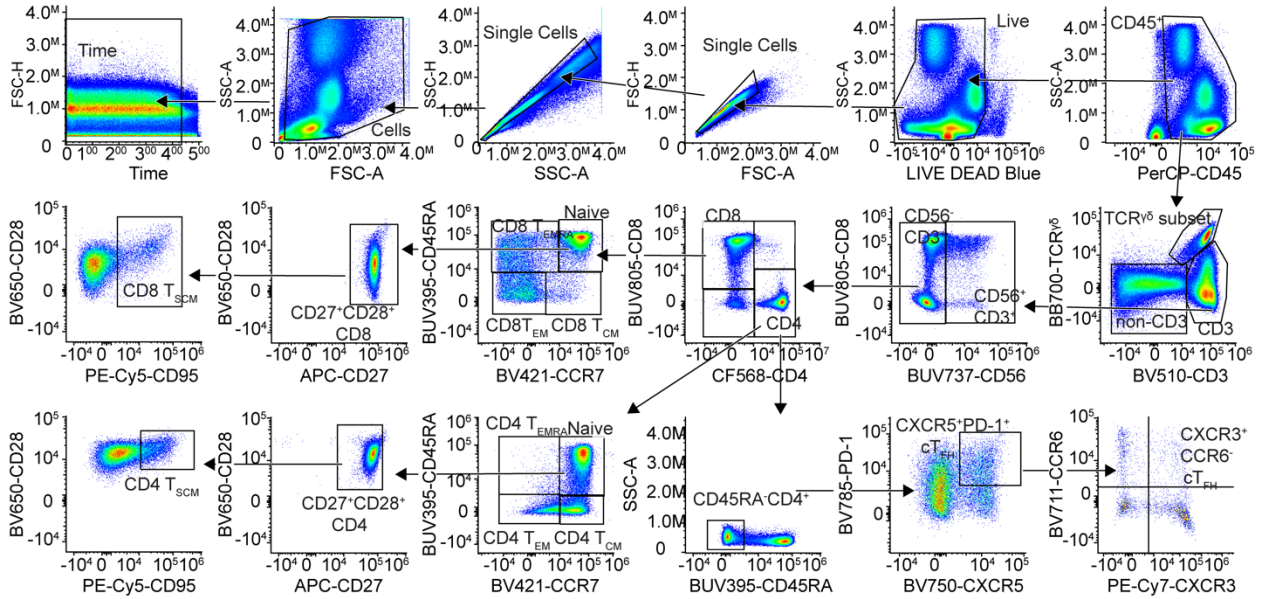

**Supplementary Figure 8. Gating strategy of major CD4<sup>+</sup> and CD8<sup>+</sup> T cell populations in PBMCs**

Representative flow cytometry plots are shown. T<sub>SCM</sub> are T stem cell-like memory cells, T<sub>EM</sub> are effector memory T cells, T<sub>CM</sub> are central memory T cells, T<sub>EMRA</sub> are terminally differentiated effector memory T cells, and cT<sub>FH</sub> are circulating T follicular helper cells.

**Supplementary Figure 9**

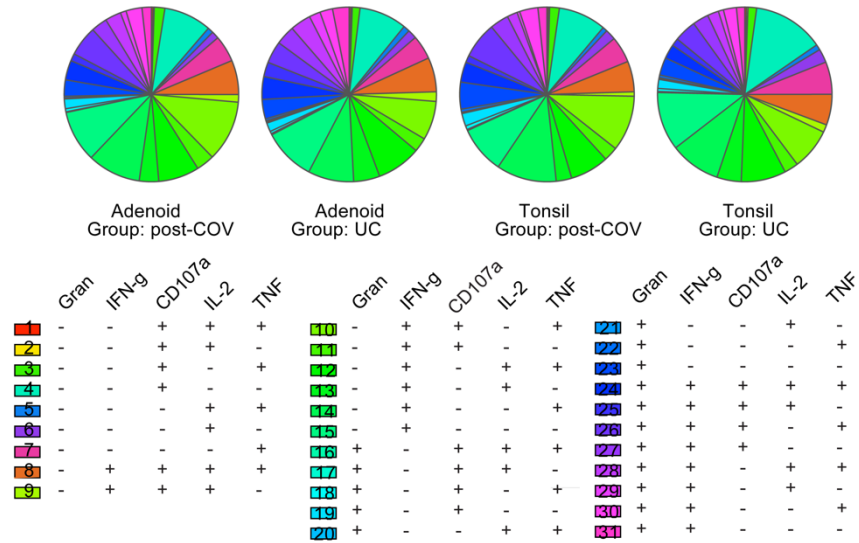

**Supplementary Figure 9. SPICE analysis of CD8<sup>+</sup> T cells from tonsil and adenoid**

Pie charts show the proportion of responding CD8<sup>+</sup> T cells from adenoids and tonsils producing 31 different combinations of 6 cytokines (granzyne B, IFN-γ, CD107a, IL-2 and TNF) after PMA and ionomycin stimulation from post-COV and UC donors (adenoid post-COV n = 13, UC n = 13; tonsil post-COV n = 13, UC n = 13). Frequencies were determined by Boolean combination gates in FlowJo and analyzed with SPICE software. Combinations with frequencies < 0.01 from each donor were excluded from the analysis. Combinations with significant differences in post-COV and UC are highlighted in red. Significance calculated using two-sided Mann-Whitney U test. Combinations with significant differences (p<0.05) in post-COV and UC are highlighted in red.

## Supplementary Figure 10

a

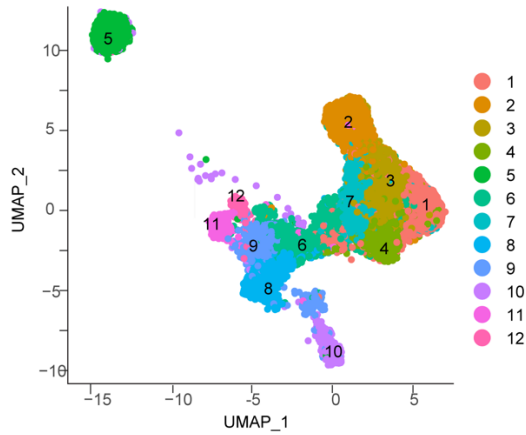

b

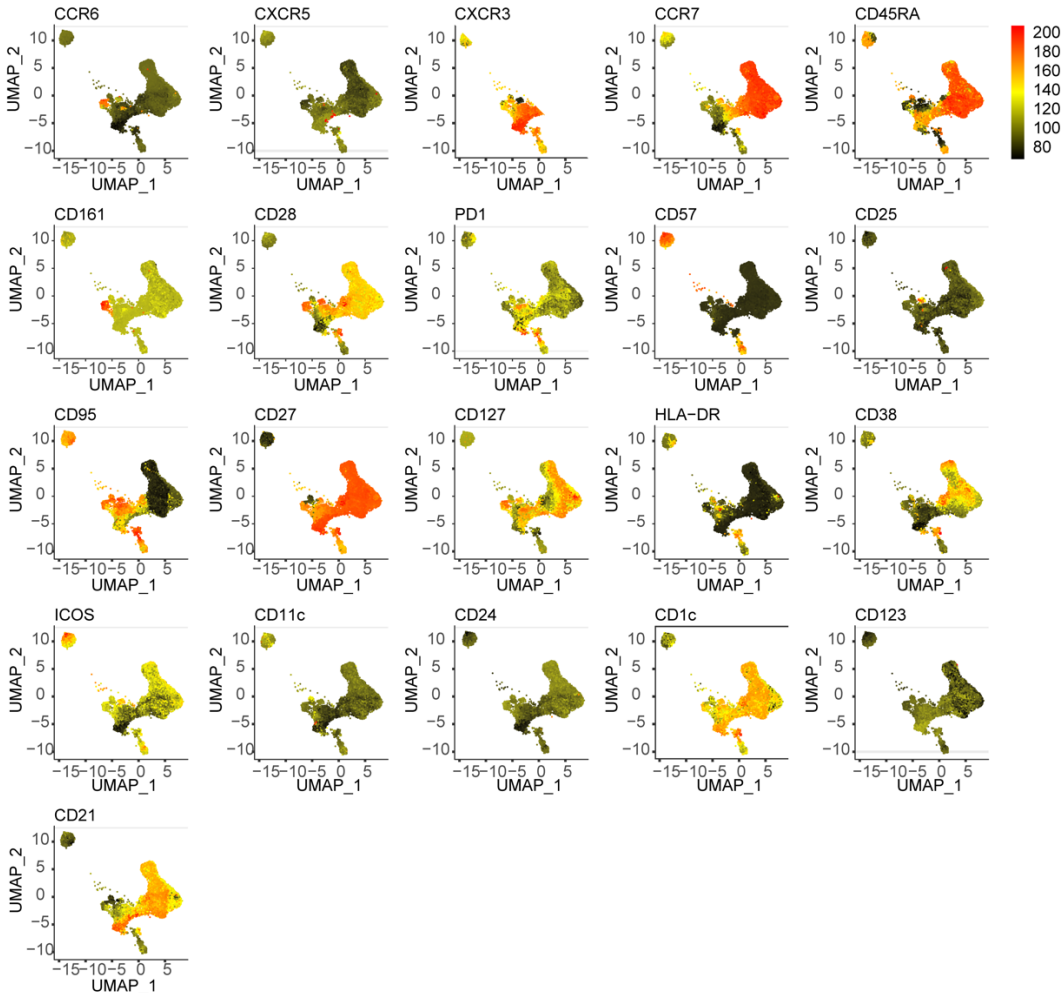

### Supplementary Figure 10. UMAP of unsupervised clustering of CD8<sup>+</sup> T cells from PBMCs

a. UMAP of unsupervised clustering of surface markers from flow cytometric analysis of CD8<sup>+</sup> T cells from PBMCs.

b. Heatmaps of marker/antibody expression overlaid on UMAP.
